# Supplementary material
Source: bioRxiv or medRxiv preprint supplement (https://www.biorxiv.org/highwire/filestream/130491/field_highwire_adjunct_files/11/434654-9.pdf)
Supplement: Supplementary file [file 434654-9.pdf]

1 **Table S8.** Statistics of the model that best fitted ( $P < 0.05$ ,  $BIC = 69.7$ ) our data but that, in our  
2 opinion, does not have a biological meaning. Significance codes:  $P < 0.001$  '\*\*\*'.

|                   | <b>Estimate</b> | <b>Std. Error</b> | <b>t-value</b> | <b>P</b>      |
|-------------------|-----------------|-------------------|----------------|---------------|
| (Intercept)       | 0.238           | 0.193             | 1.228          | 0.225         |
| TMB               | 417.569         | 102.650           | 4.068          | $< 0.001$ *** |
| log(AMB):Moisture | 0.071           | 0.3118            | 0.228          | 0.821         |
| TMB:SeasonF       | -459.540        | 0.780             | -5.890         | $< 0.001$ *** |

3
